# Supplementary material
Source: Springer Nature journal article supplement (https://www.springermedizin.de/resource/supplementary/13023_2013_597_MOESM6_ESM.pdf/9642494)

■ EXOC6B patient      ▲ RBPJ control  
◆ EXOC6B control      ◆ HES1 patient  
● RBPJ patient      ● HES1 control

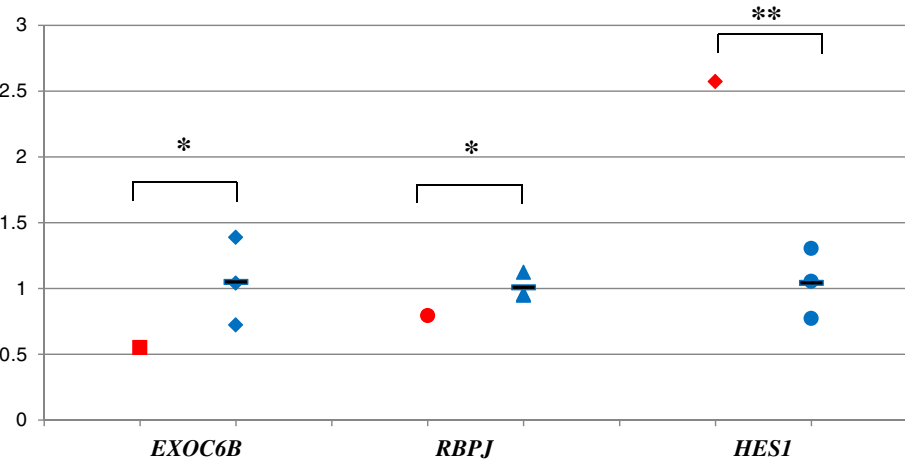

Supplement: MOESM6 [file 9642494]
